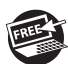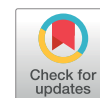

## Issues and Events

### IDF CONGRESS 2019

The International Diabetes Federation (IDF) Congress will be held in Busan, Korea, 2–6 December 2019. The IDF Congress explores new areas in diabetes research, education, and public health. Key objectives include promoting better understanding of the global diabetes pandemic and influencing the implementation of health care initiatives to improve the lives of the millions of people living with diabetes and the many more at risk. Please visit <https://idf.org> for further information.

### 80th SCIENTIFIC SESSIONS SUBMISSIONS

The American Diabetes Association's Scientific Sessions Planning Committee is soliciting noteworthy abstract submissions for the 80th Scientific Sessions, which will take place 12–16 June 2020 at the McCormick Place Convention Center in Chicago, IL. The committee encourages submissions that are innovative, challenge current treatment paradigms, and represent the latest advances in basic, clinical, and translational science. The submission deadline is 12 January 2020. Please visit [professional.diabetes.org/scientific-sessions](https://professional.diabetes.org/scientific-sessions) for further information.

### 79th SCIENTIFIC SESSIONS WEBCASTS

Webcasts from the 79th annual American Diabetes Association Scientific Sessions are available. Held in June 2019, this meeting brought together scientists and health care professionals to discuss issues pertaining to diabetes research, care, and education. To access the webcasts, please visit [professional.diabetes.org/webcasts-ss2019](https://professional.diabetes.org/webcasts-ss2019).

### ADVANCED POSTGRADUATE COURSE

The 67th annual American Diabetes Association Advanced Postgraduate Course will be held in San Francisco, CA, from 31 January to 2 February 2020. Join your colleagues and diabetes experts for presentations and discussions on cutting-edge clinical research in diabetes. The course will cover the latest clinical research translated into evidence-based treatment strategies to improve outcomes in your patients with diabetes. Discuss clinical cases with world-renowned faculty and take home practical patient management tools that you can use immediately in your practice. For more information, please visit [professional.diabetes.org/ce](https://professional.diabetes.org/ce).

### DIABETES IS PRIMARY

Diabetes Is Primary will be held in Phoenix, AZ, on 25 February 2020. The American Diabetes Association will bring together health care professionals interested in the clinical management of diabetes and its complications for an innovative educational initiative developed specifically for the primary care community. This initiative will offer information and tools needed to improve patient outcomes through patient engagement. For more information, please visit [professional.diabetes.org/diabetes-primary](https://professional.diabetes.org/diabetes-primary).

### DIABETES CORE UPDATE PODCASTS

*Diabetes Core Update* is a monthly audio podcast devoted to presenting and discussing the latest clinically relevant articles from the American Diabetes Association's scholarly journals. *Diabetes Core Update* audio podcasts are free and can be accessed through iTunes or RSS feed. For more information, please visit [diabetesjournals.org/content/diabetes-core-update-podcasts](https://diabetesjournals.org/content/diabetes-core-update-podcasts).
